# Supplementary material for: Brain Cholesterol Biosynthetic Pathway Is Altered in a Preclinical Model of Fragile X Syndrome
Source: MDPI journal article supplement (doi:10.3390/ijms23063408), 2022-03-21

HMGCR and LDLR protein level in brain areas of *Fmr1*-Δexon 8 and WT male adolescent (PND35) and adult (PND90) rats

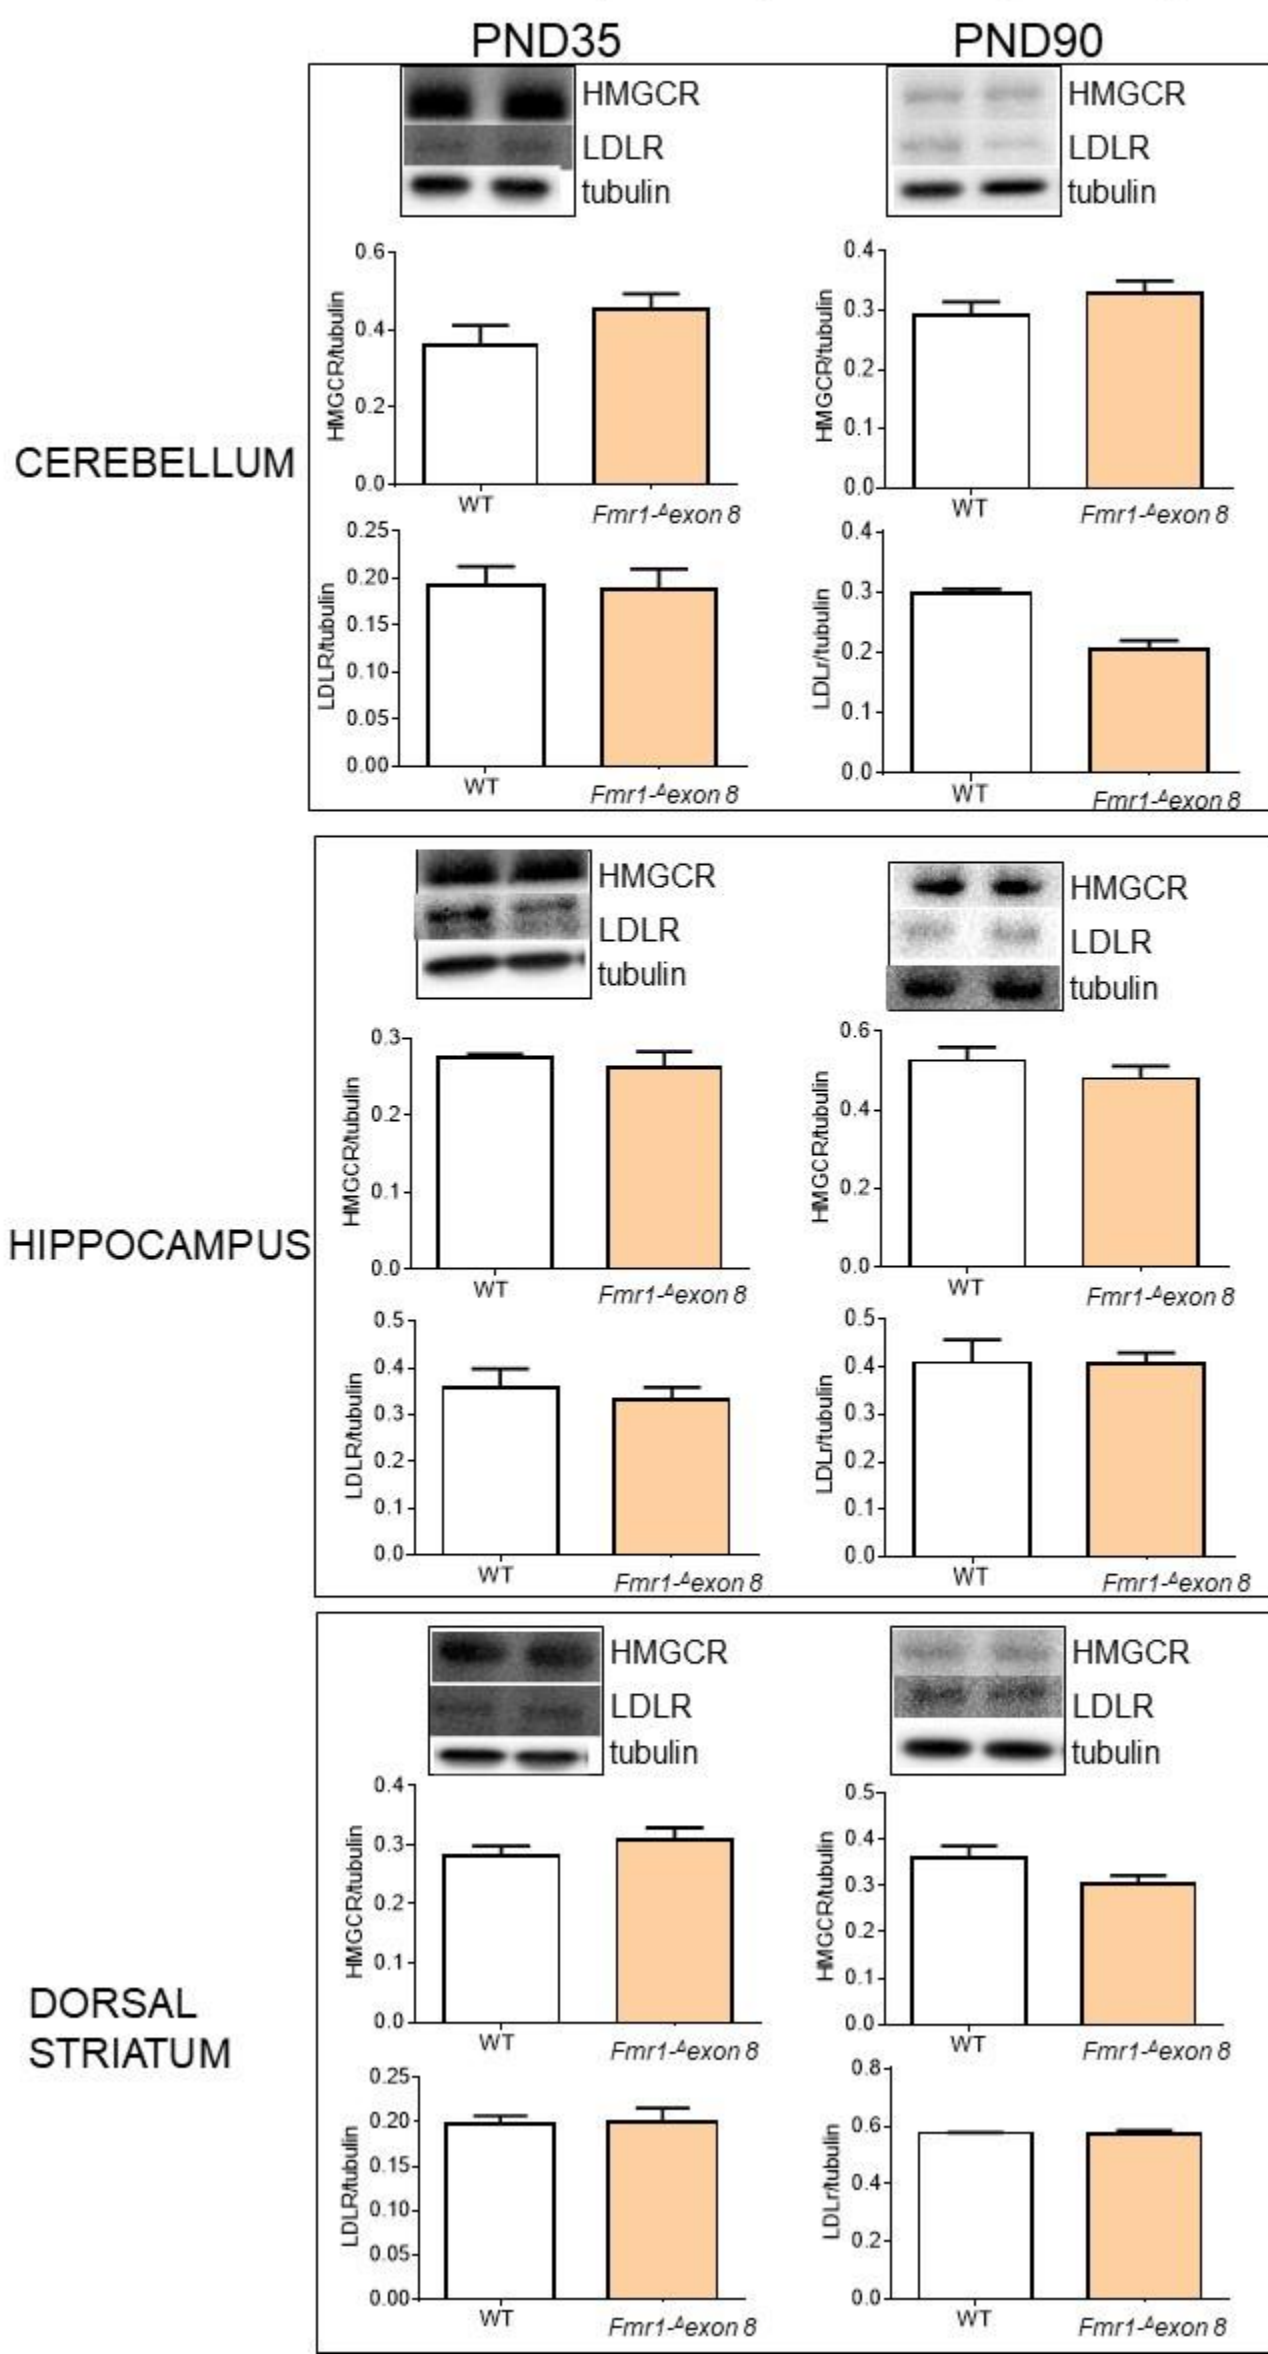

**Figure S2**

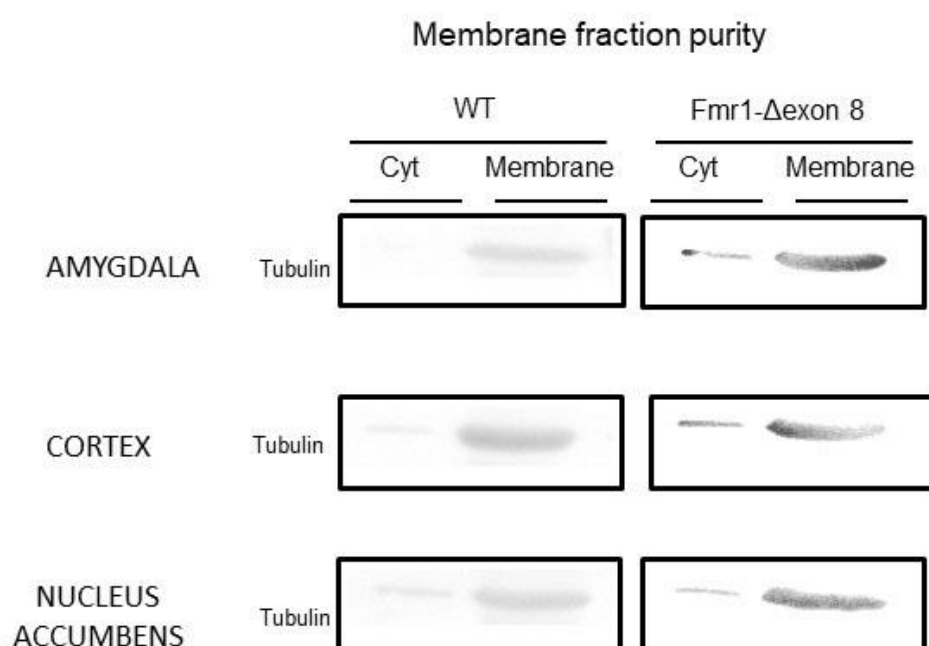

Figure S3

Membrane-bound and total level ratio of HRas and RhoA protein content in brain areas of *Fmr1*-Δexon 8 and WT adult (PND90) male rats

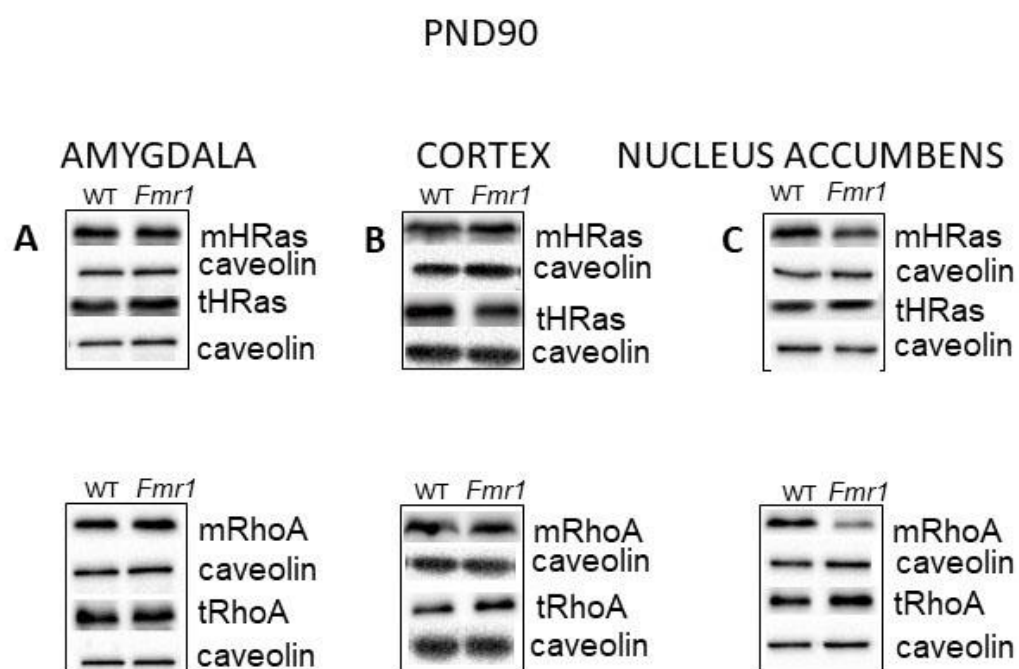

Supplement: s1 [file s1]
